# Supplementary material for: Application of Hepatic Venous Pressure Gradient to Predict Prognosis in Cirrhotic Patients with a Low Model for End-stage Liver Disease Score
Source: MDPI journal article supplement (doi:10.3390/diagnostics10100805), 2020-10-10
Supplement: s1 [file s1]

## Supplement

A

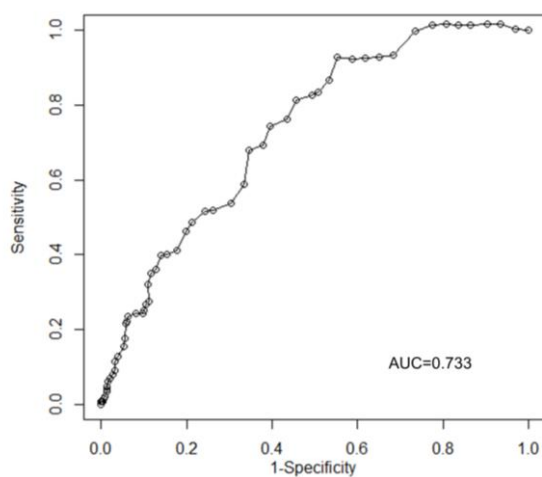

B

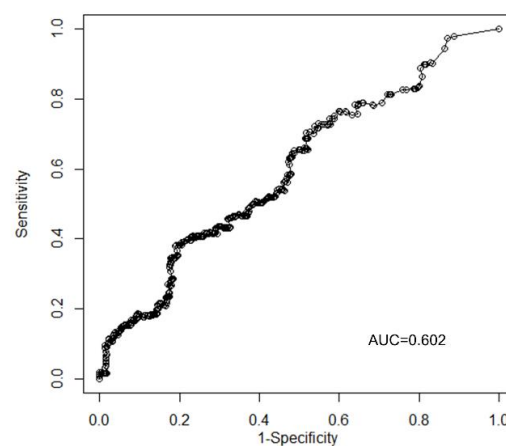

**Supplementary Figure 1.** The time-dependent receiver operating characteristic (ROC) curve for predicting overall survival of the H6C score (A) and the Model for End-Stage Liver Disease (MELD) (B). The area under the time-dependent ROC of the H6C score was higher than that of the MELD.

A

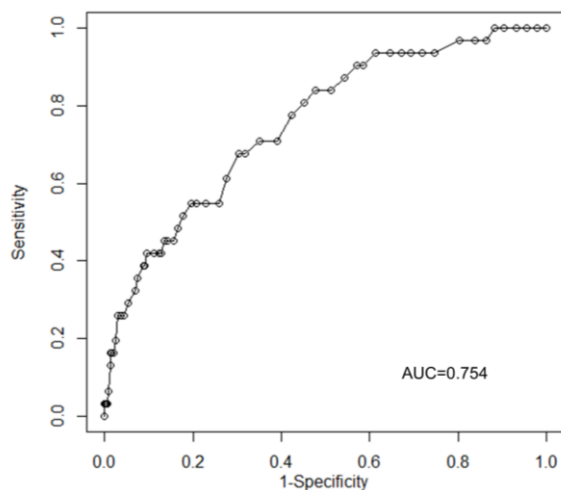

B

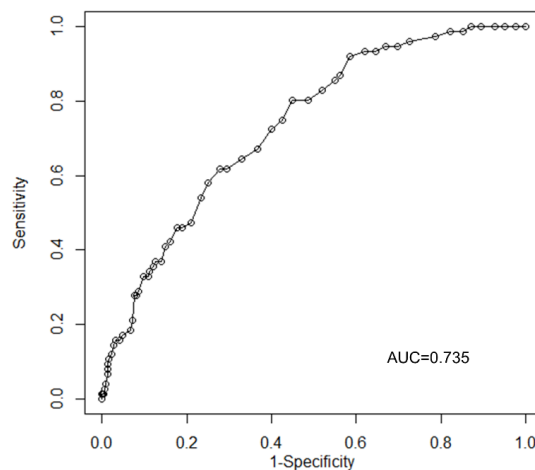

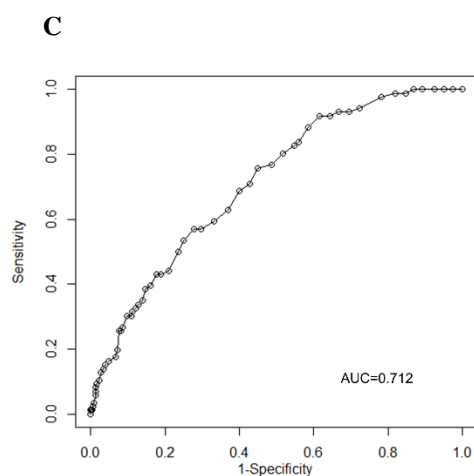

**Supplementary Figure 2.** The receiver operating characteristic curves for predicting the 1-year (A), 3-year (B) and 5-year (C) survival rate of the H6C score.

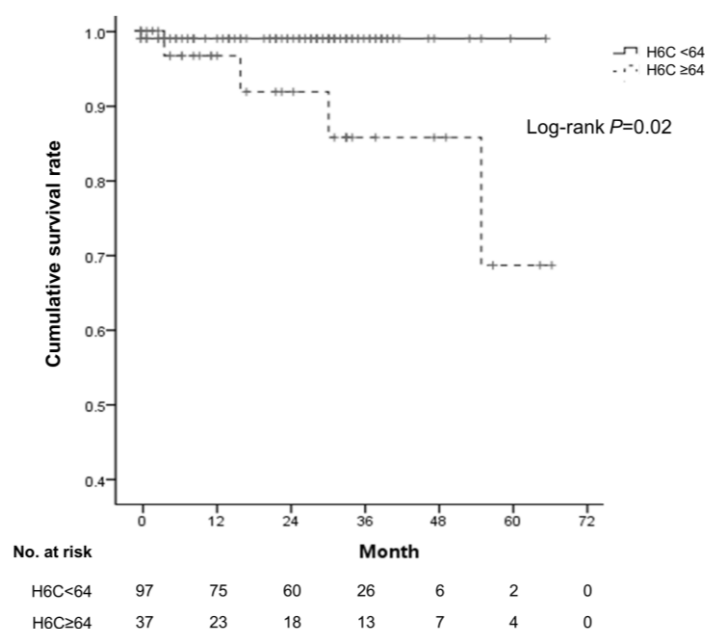

**Supplementary Figure 3.** The cumulative survival rates according to the H6C score in the validation cohort. Patients with a low H6C score (shown as a continuous line) showed significantly higher survival rate than those with a high H6C score (shown as a dashed line).

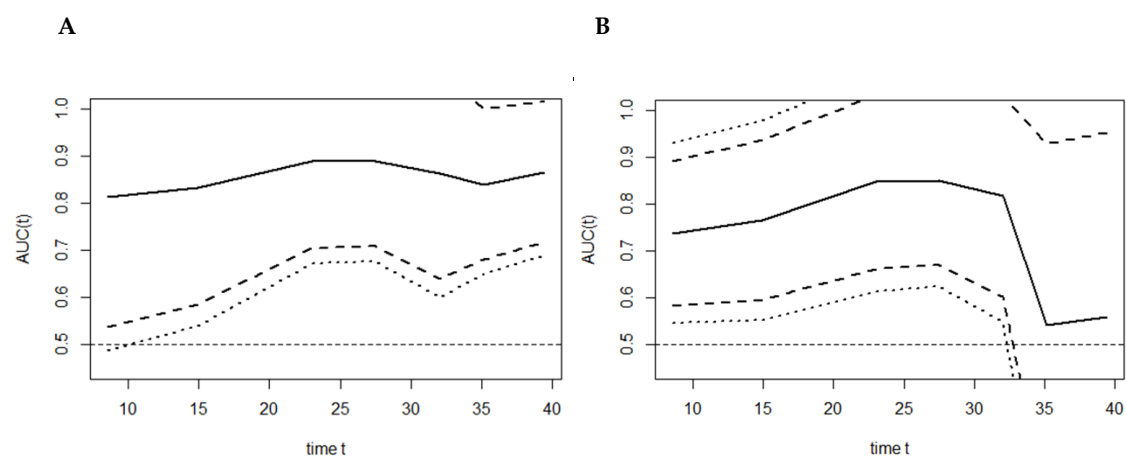

**Supplementary Figure 4.** The curve of time-dependent area under the curve (AUC) for predicting the overall survival of the H6C score (A) and the Model for End-Stage Liver Disease (MELD) (B) in the validation cohort. The AUCs of the H6C score were consistently higher than those of the MELD over time.

**Supplementary Table 1.** Baseline characteristics of the study population according to the H6C score.

|                                 | <b>H6C &lt; 45<br/>(n =138)</b> | <b>45 ≤ H6C&lt;55<br/>(n =147)</b> | <b>55 ≤ H6C &lt; 64<br/>(n =142)</b> | <b>64 ≤ H6C<br/>(n =139)</b> | <b>p value</b> |
|---------------------------------|---------------------------------|------------------------------------|--------------------------------------|------------------------------|----------------|
| Age (year)                      | 51.61±9.81                      | 52.15±9.71                         | 53.94±9.80                           | 52.45±9.45                   | 0.213          |
| Male, no. (%)                   | 107 (77.5)                      | 111 (75.5)                         | 113 (79.6)                           | 108 (74.5)                   | 0.778          |
| Platelet count                  | 132.22±76.06                    | 113.72±74.50                       | 116.54±68.49                         | 106.93±69.67                 | 0.029          |
| Albumin<br>(g/dL)               | 3.88±0.33                       | 3.47±0.50                          | 3.19±0.47                            | 2.77±0.40                    | <0.001         |
| Total bilirubin<br>(mg/dL)      | 0.89±0.46                       | 1.19±0.74                          | 1.68±1.08                            | 2.68±1.20                    | <0.001         |
| AST (U/L)                       | 69.19±109.43                    | 63.81±43.62                        | 68.50±50.61                          | 71.52±85.27                  | 0.856          |
| ALT (U/L)                       | 62.98±144.46                    | 45.85±77.31                        | 35.73±40.77                          | 32.12±31.11                  | 0.013          |
| PT (INR)                        | 1.08±0.13                       | 1.13±0.14                          | 1.21±0.17                            | 1.44±0.28                    | <0.001         |
| Creatinine<br>(mg/dL)           | 0.78±0.20                       | 0.74±0.18                          | 0.77±0.20                            | 0.76±0.24                    | 0.403          |
| Ascites, no. (%)                |                                 |                                    |                                      |                              | <0.001         |
| None                            | 130 (94.2)                      | 102 (69.4)                         | 57 (40.1)                            | 11 (7.9)                     |                |
| Small                           | 8 (5.8)                         | 44 (29.9)                          | 71 (50.0)                            | 77 (55.4)                    |                |
| Moderate                        | 0 (0)                           | 1 (0.7)                            | 14 (9.9)                             | 51 (36.7)                    |                |
| Hepatic encephalopathy, no. (%) |                                 |                                    |                                      |                              | <0.001         |
| None                            | 138 (100)                       | 146 (99.3)                         | 130 (91.5)                           | 114 (82.0)                   |                |
| Grade 1-2                       | 0 (0)                           | 1 (0.7)                            | 9 (6.3)                              | 19 (13.7)                    |                |
| Grade 3-4                       | 0 (0)                           | 0 (0)                              | 3 (2.1)                              | 6 (4.3)                      |                |
| Child-Pugh score                | 5.20±0.40                       | 6.10±0.71                          | 7.20±0.72                            | 9.22±1.26                    | <0.001         |
| MELD                            | 7.90±1.51                       | 8.76±2.01                          | 10.27±2.53                           | 13.91±2.97                   | <0.001         |
| HVPG                            | 9.52±2.63                       | 13.17±3.64                         | 15.59±3.66                           | 19.39±4.36                   | <0.001         |
| H6C score                       | 40.70±2.74                      | 49.74±2.95                         | 58.82±2.54                           | 74.68±8.12                   | <0.001         |

Data were presented as mean±SD.

AST, aspartate aminotransferase; ALT, alanine aminotransferase; MELD, model for end stage liver disease; HVPG, hepatic venous pressure gradient, SD, standard deviation.

**Supplementary Table 2.** Baseline characteristics of the derivation cohort according to the etiologies of chronic liver disease.

|                                 | Total<br>(n =566) | Viral etiology<br>(n =192) | Non-viral etiology<br>(n =374) | p value |
|---------------------------------|-------------------|----------------------------|--------------------------------|---------|
| Age (year)                      | 52.55±9.68        | 51.99±9.60                 | 52.82±9.76                     | 0.334   |
| Male, no. (%)                   | 435 (76.9)        | 124 (64.6)                 | 311 (83.2)                     | <0.001* |
| Platelet count                  | 116.77±72.44      | 97.71±61.56                | 127.31±75.87                   | <0.001* |
| Albumin (g/dL)                  | 3.32±0.59         | 3.38±0.67                  | 3.30±0.54                      | 0.146   |
| Total bilirubin (mg/dL)         | 1.63±1.15         | 1.45±0.98                  | 1.69±1.20                      | 0.013*  |
| AST (U/L)                       | 67.98±75.94       | 70.63±96.72                | 66.94±63.39                    | 0.586   |
| ALT (U/L)                       | 43.92±85.59       | 63.14±133.79               | 34.35±41.92                    | 0.004*  |
| Prothrombin time (INR)          | 1.22±0.26         | 1.23±0.24                  | 1.20±0.23                      | 0.142   |
| Creatinine (mg/dL)              | 0.76±0.21         | 0.76±0.19                  | 0.76±0.21                      | 0.862   |
| Ascites, no. (%)                |                   |                            |                                | 0.172   |
| None                            | 300 (53.0)        | 110 (57.3)                 | 190 (50.8)                     |         |
| Small                           | 200 (35.3)        | 62 (32.3)                  | 138 (36.9)                     |         |
| Moderate                        | 66 (11.7)         | 20 (10.4)                  | 46 (12.3)                      |         |
| Hepatic encephalopathy, no. (%) |                   |                            |                                | 0.079   |
| None                            | 528 (93.3)        | 184 (95.8)                 | 344 (92.0)                     |         |
| Grade 1-2                       | 29 (5.1)          | 6 (3.1)                    | 23 (6.1)                       |         |
| Grade 3-4                       | 9 (1.6)           | 2 (1.1)                    | 7 (1.9)                        |         |
| Child-Pugh score                | 6.97±1.76         | 6.71±1.80                  | 7.03±1.65                      | 0.038*  |
| MELD                            | 10.31±3.42        | 10.09±3.23                 | 10.25±3.26                     | 0.595   |

Data were presented as mean±SD.

AST, aspartate aminotransferase; ALT, alanine aminotransferase; MELD, model for end stage liver disease; SD, standard deviation.

**Supplementary Table 3.** Estimated time-dependent AUC of the H6C score and the MELD among the validation cohort.

| Time (months) | H6C   |             | MELD  |             |
|---------------|-------|-------------|-------|-------------|
|               | AUC   | 95% CI      | AUC   | 95% CI      |
| 8.6           | 0.814 | 0.538–1.090 | 0.739 | 0.585–0.893 |
| 14.9          | 0.834 | 0.586–1.081 | 0.766 | 0.596–0.937 |
| 27.5          | 0.890 | 0.710–1.070 | 0.850 | 0.670–1.030 |
| 35.1          | 0.841 | 0.681–1.001 | 0.542 | 0.155–0.930 |
| 39.4          | 0.866 | 0.717–1.015 | 0.559 | 0.166–0.952 |

AUC, area under the receiver operating characteristic curve; MELD, model for end stage liver disease, CI, confidence interval.
